# Supplementary material
Source: publisher site journal article supplement (https://www.spandidos-publications.com/4902/downloadSupplementary)
Supplement: Supplementary file 1 [file downloadSupplementary]

## Sheet: Sheet1
Table SI. Sequences of siRNAs used in the present study.
Oligonucleotides	5'-3'
siRNA1	CCGAGAGAAGUGCUUCAAATT
siRNA2	CCACACAGCACCAUGGAUUTT
siRNA-negative control	UUCUCCGAACGUGUCACGUTT
